# Supplementary material for: Reactive Oxygen Species Imaging in U937 Cells
Source: Front Physiol. 2020 Oct 15;11:552569. doi: 10.3389/fphys.2020.552569 (PMC7593787; doi:10.3389/fphys.2020.552569)
Supplement: Supplementary Data 2 — Focusing through a non-differentiated (A) and differentiated (B) U937 cell. The differentiation of the cell was induced using 100 nM PMA for 48 h. The video represents a series of 9 (A) and 11 (B) optical sections (x,y) through a sample sequentially acquired at z = 1 μm. [file Data_Sheet_2.ZIP]

Archive with 4 entries (3 files):
- Supplementary data 2/
- Supplementary data 2/desktop.ini
- Supplementary data 2/Supplementary data 2A.avi
- Supplementary data 2/Supplementary data 2B.avi
